# Supplementary material for: Germinal center B cells that acquire nuclear proteins are specifically suppressed by follicular regulatory T cells
Source: eLife. 2023 Mar 2;12:e83908. doi: 10.7554/eLife.83908 (PMC9981149; doi:10.7554/eLife.83908)
Supplement: Figure 2—figure supplement 1—source data 1. [file elife-83908-fig2-figsupp1-data1.xlsx]

## Sheet: Sheet1
	FeatureID	FeatureName	SA Average	SA-NucPr Average	P-Value
	ENSMUSG00000022899	Slc15a2	0.0132	0	1.75e-14
	ENSMUSG00000094468	Trav6-4	0.0191	0.1151	4.74e-06
	ENSMUSG00000087666	B230359F08Rik	0.0898	0.0015	8.39e-06
	ENSMUSG00000058626	Capn11	0	0.0061	0.00394703
	ENSMUSG00000031125	3830403N18Rik	0.0069	0.0255	0.00395309
	ENSMUSG00000076866	Trdv2-2	0.0543	0.0115	0.00592283
	ENSMUSG00000076764	Trav6-2	0.1083	0.0363	0.0390618
	ENSMUSG00000002985	Apoe	1.5802	0.6513	0.0469045
